# Supplementary material
Source: PubMed Central journal article supplement (PMC8523601)
Supplement: NIHMS1703390-supplement-Supplement-Hoilungia.pdf [file NIHMS1703390-supplement-Supplement-Hoilungia.pdf]

## Supplemental Data

—

### **Hidden cell diversity in Placozoa: Ultrastructural Insights from *Hoilungia hongkongensis***

Daria Y. Romanova<sup>1, 2, \*</sup>, Frédérique Varoquaux<sup>1, 3, \*</sup>, Jean Daraspe<sup>4</sup>, Mikhail A. Nikitin<sup>5, 6</sup>, Michael Eitel<sup>7</sup>, Dirk Fasshauer<sup>1, 3, §</sup>, and Leonid L. Moroz<sup>8, 9, §</sup>

<sup>1</sup>Department of Fundamental Neurosciences, University of Lausanne, 1005 Lausanne, Switzerland; <sup>2</sup>Cellular Neurobiology of Learning Lab, Institute of Higher Nervous Activity and Neurophysiology, Moscow 117485, Russia; <sup>3</sup>Department of Computational Biology, University of Lausanne, 1015 Lausanne, Switzerland; <sup>4</sup>Electron Microscopy Facility, University of Lausanne, Lausanne, Switzerland; <sup>5</sup>Belozersky Institute of Physico-Chemical Biology, Moscow State University, Moscow 119991, Russia; <sup>6</sup>Kharkevich Institute for Information Transmission Problems, Russian Academy of Sciences, Moscow 127994, Russia; <sup>7</sup>Department of Earth and Environmental Sciences, Paleontology and Geobiology, Ludwig-Maximilians Universität München, Munich, Germany; <sup>8</sup>Whitney Laboratory for Marine Bioscience, University of Florida, St. Augustine, FL, 32080, USA; <sup>9</sup>Departments of Neuroscience and McKnight Brain Institute, University of Florida, Gainesville, FL, 32610, USA.

\* These authors contributed equally to this work

§ These authors contributed equally to this work

Correspondence to

Leonid L. Moroz; email: [moroz@whitney.ufl.edu](mailto:moroz@whitney.ufl.edu); Tel: 1-904-461-4000;

<https://orcid.org/0000-0002-1333-3176>

Daria Y. Romanova; email: [darjaromanova@gmail.com](mailto:darjaromanova@gmail.com); <https://orcid.org/0000-0002-7508-3969>, and

Dirk Fasshauer; email: [dirk.fasshauer@unil.ch](mailto:dirk.fasshauer@unil.ch); <https://orcid.org/0000-0002-1040-4282>

Supplemental Figures

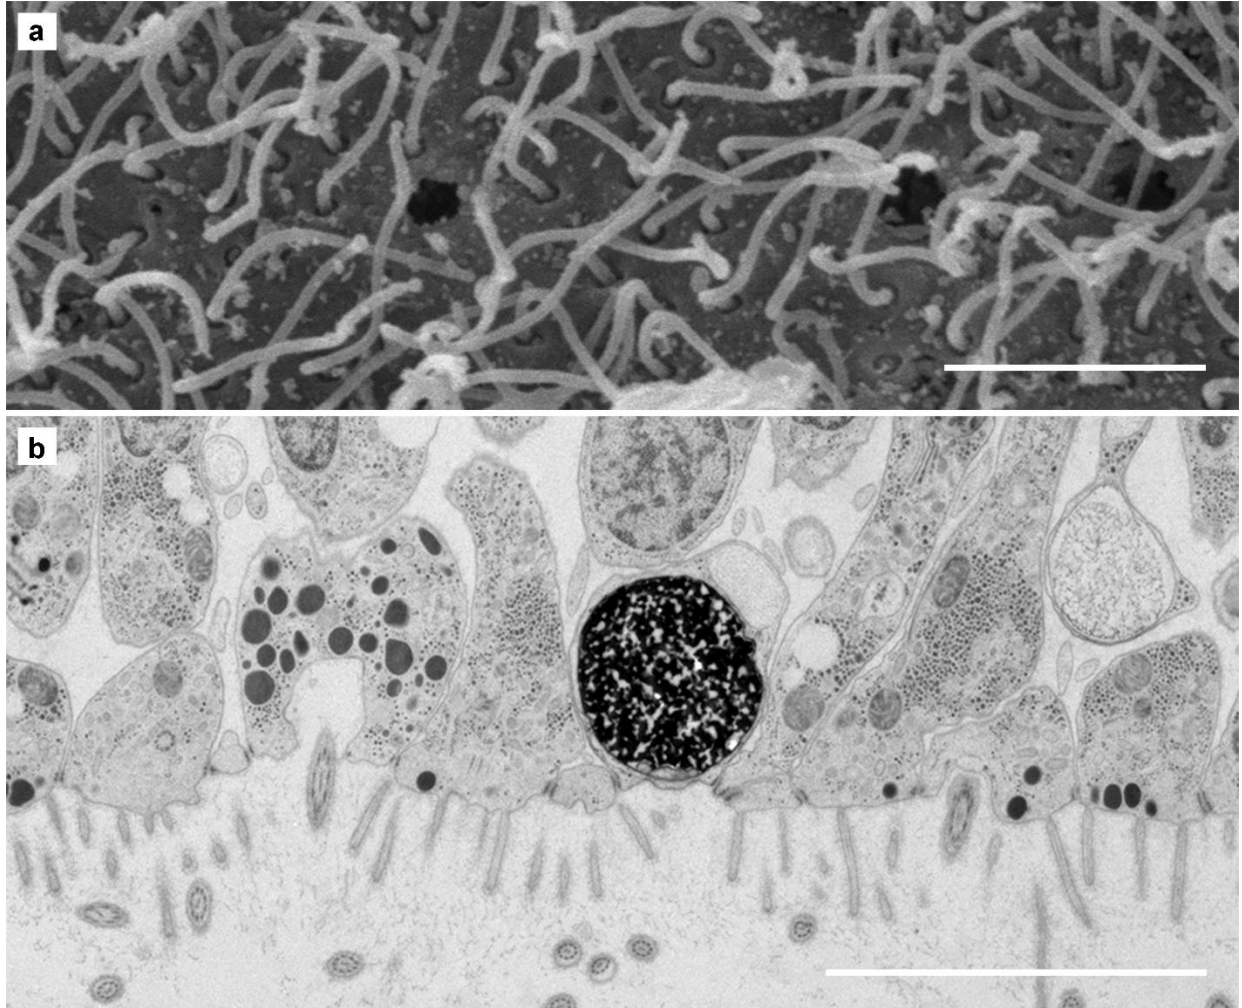

**Supplemental Figure 1: Pores in the ventral epithelium.** (a) At the SEM, pores are often seen between ciliated cells. (b) At the TEM, the outermost large granule of a lipophil cell abuts the epithelial surface, forming a recess between two epithelial cells. Its size is comparable to this of pores observed in (a). Scale bar: 5  $\mu\text{m}$ .

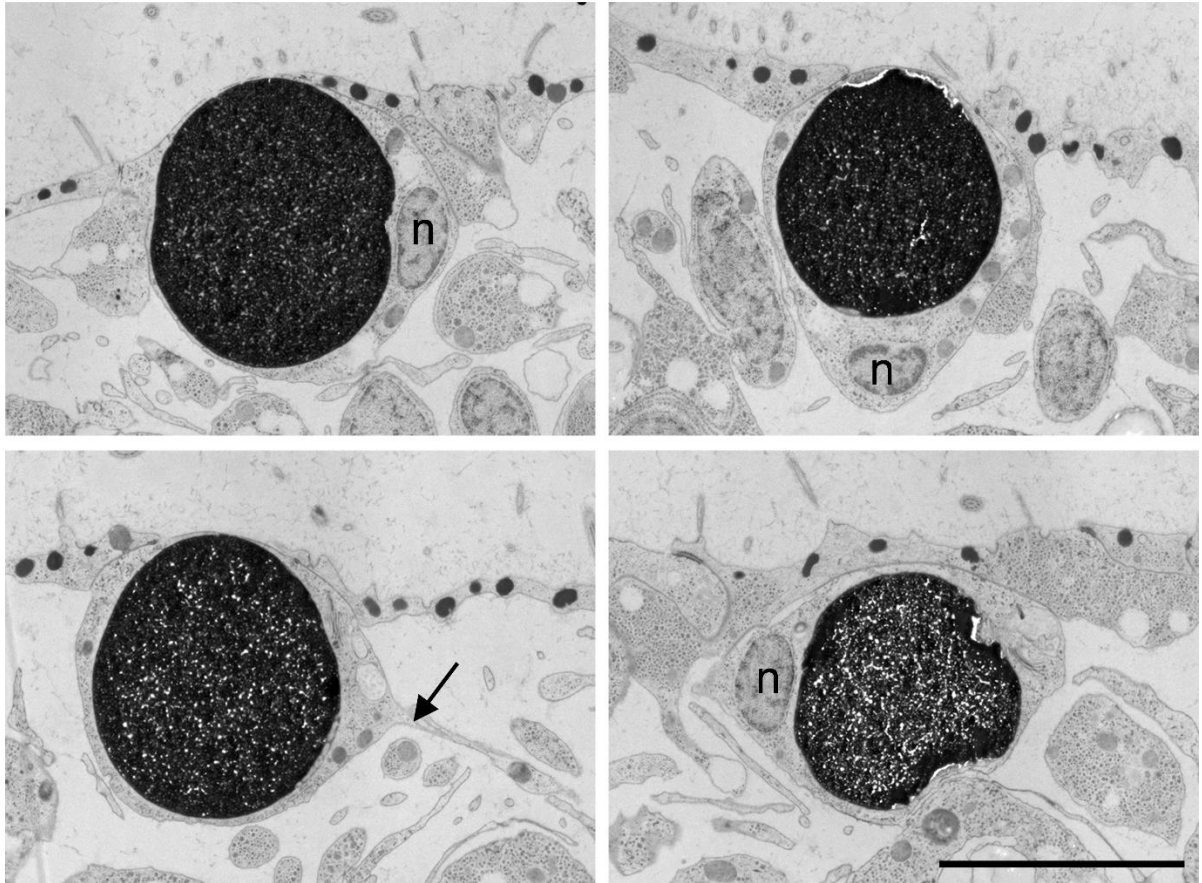

**Supplemental Figure 2: Sphere cells in the dorsal epithelium.** The large vacuoles (“shiny spheres”) contained in sphere cells often reach the very surface of the epithelium (likely to be released), conferring it a locally convex shape. Sphere cells contain a single large vacuole, a small and slightly flattened nucleus (n) located in their periphery (likely due to the steric bulk of the vacuole) and thin processes (arrow). Scale bar: 5  $\mu$ m.

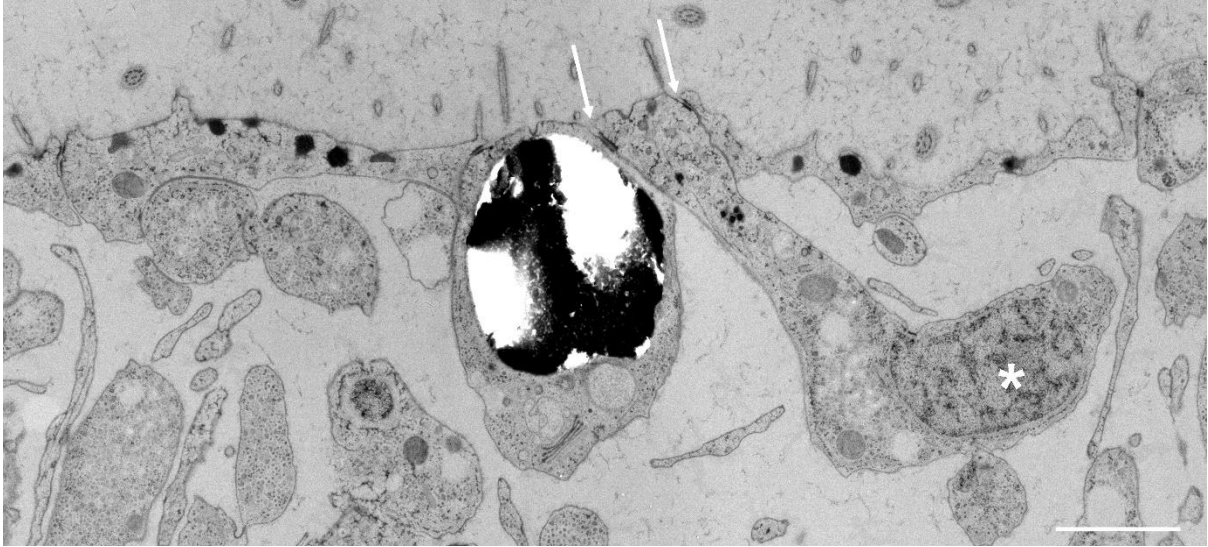

**Supplemental Figure 3: Cells of the dorsal epithelium.** A cell with a narrow neck (asterisk) is observed here between a sphere cell and a dorsal epithelial cell. Its surface coverage (between arrows) is very limited as compared to this of regular dorsal epithelial cells. Scale bar: 2  $\mu\text{m}$ .
